# Supplementary material
Source: publisher figshare collection journal article supplement (https://acs.figshare.com/ndownloader/files/4266181)
Supplement: Supplementary file 1 [file 4266181]

 
data_PERIalfa

_audit_creation_method           SHELXL-97
_chemical_name_systematic        
; 
 ? 
;
_chemical_name_common            ?
_chemical_melting_point          ?
_chemical_formula_moiety         'C23 H43 N3 O5'
_chemical_formula_sum            'C23 H43 N3 O5'
_chemical_formula_weight         441.60

loop_
_atom_type_symbol
_atom_type_description
_atom_type_scat_dispersion_real
_atom_type_scat_dispersion_imag
_atom_type_scat_source
C C 0.0033 0.0016 'International Tables Vol C Tables 4.2.6.8 and 6.1.1.4'
H H 0.0000 0.0000 'International Tables Vol C Tables 4.2.6.8 and 6.1.1.4'
N N 0.0061 0.0033 'International Tables Vol C Tables 4.2.6.8 and 6.1.1.4'
O O 0.0106 0.0060 'International Tables Vol C Tables 4.2.6.8 and 6.1.1.4'

_symmetry_cell_setting           Orthorhombic
_symmetry_space_group_name_H-M   P212121

loop_
_symmetry_equiv_pos_as_xyz
'x, y, z'
'-x+1/2, -y, z+1/2'
'x+1/2, -y+1/2, -z'
'-x, y+1/2, -z+1/2'

_cell_length_a                   6.574(6)
_cell_length_b                   12.213(7)
_cell_length_c                   31.326(9)
_cell_angle_alpha                90.00
_cell_angle_beta                 90.00
_cell_angle_gamma                90.00
_cell_volume                     2515(3)
_cell_formula_units_Z            4
_cell_measurement_temperature    150(2)
_cell_measurement_reflns_used    16246
_cell_measurement_theta_min      1.79
_cell_measurement_theta_max      25.70

_exptl_crystal_description       ?
_exptl_crystal_colour            ?
_exptl_crystal_size_max          ?
_exptl_crystal_size_mid          ?
_exptl_crystal_size_min          ?

_exptl_crystal_density_meas      'not measured'
_exptl_crystal_density_diffrn    1.166
_exptl_crystal_density_method    'not measured'
_exptl_crystal_F_000             968
_exptl_absorpt_coefficient_mu    0.082

_exptl_absorpt_correction_type   none
_exptl_absorpt_correction_T_min  ?
_exptl_absorpt_correction_T_max  ?
_exptl_absorpt_process_details   ?

_exptl_special_details           
; 
 ? 
;

_diffrn_ambient_temperature      150(2)


_diffrn_radiation_wavelength     0.71069
_diffrn_radiation_type           MoK\a
_diffrn_radiation_source         'fine-focus sealed tube'
_diffrn_radiation_monochromator  graphite
_diffrn_measurement_device_type  'Bruker APEX-II CCD area detector'
_diffrn_measurement_method       'phi and omega scans'
_diffrn_detector_area_resol_mean ?
_diffrn_standards_number         ?
_diffrn_standards_interval_count ?
_diffrn_standards_interval_time  ?
_diffrn_standards_decay_%        ?
_diffrn_reflns_number            16246
_diffrn_reflns_av_R_equivalents  0.0612
_diffrn_reflns_av_sigmaI/netI    0.0717
_diffrn_reflns_limit_h_min       -8
_diffrn_reflns_limit_h_max       6
_diffrn_reflns_limit_k_min       -14
_diffrn_reflns_limit_k_max       13
_diffrn_reflns_limit_l_min       -38
_diffrn_reflns_limit_l_max       38
_diffrn_reflns_theta_min         1.79
_diffrn_reflns_theta_max         25.70
_reflns_number_total             4715
_reflns_number_gt                3399
_reflns_threshold_expression     >2sigma(I)


_computing_data_collection       'BRUKER APEX2 (Bruker, 2005)'
_computing_cell_refinement       'BRUKER SMART (Bruker, 2005)'
_computing_data_reduction        'BRUKER SAINT (Bruker, 2005)'
_computing_structure_solution    'SIR 97 (Altomare et al, 1999)'
_computing_structure_refinement  'SHELXL-97 (Sheldrick, 2008)'
_computing_molecular_graphics    'ORTEP 3.2 (Farrugia, 1997) and Mercury 2.2'
_computing_publication_material  ?

_refine_special_details          
; 
 Refinement of F^2^ against ALL reflections.  The weighted R-factor wR and 
 goodness of fit S are based on F^2^, conventional R-factors R are based 
 on F, with F set to zero for negative F^2^. The threshold expression of 
 F^2^ > 2sigma(F^2^) is used only for calculating R-factors(gt) etc. and is 
 not relevant to the choice of reflections for refinement.  R-factors based 
 on F^2^ are statistically about twice as large as those based on F, and R- 
 factors based on ALL data will be even larger. 
;

_refine_ls_structure_factor_coef Fsqd
_refine_ls_matrix_type           full
_refine_ls_weighting_scheme      calc
_refine_ls_weighting_details     
'calc w=1/[\s^2^(Fo^2^)+(0.2000P)^2^+0.0000P] where P=(Fo^2^+2Fc^2^)/3'
_atom_sites_solution_primary     direct
_atom_sites_solution_secondary   difmap
_atom_sites_solution_hydrogens   geom
_refine_ls_hydrogen_treatment    mixed
_refine_ls_extinction_method     SHELXL
_refine_ls_extinction_coef       0.029(10)
_refine_ls_extinction_expression Fc^*^=kFc[1+0.001xFc^2^\l^3^/sin(2\q)]^-1/4^
_refine_ls_abs_structure_details 'Flack H D (1983), Acta Cryst. A39, 876-881'
_refine_ls_abs_structure_Flack   0(4)
_refine_ls_number_reflns         4715
_refine_ls_number_parameters     282
_refine_ls_number_restraints     26
_refine_ls_R_factor_all          0.1918
_refine_ls_R_factor_gt           0.1526
_refine_ls_wR_factor_ref         0.4119
_refine_ls_wR_factor_gt          0.3855
_refine_ls_goodness_of_fit_ref   1.606
_refine_ls_restrained_S_all      1.620
_refine_ls_shift/su_max          1.332
_refine_ls_shift/su_mean         0.058

loop_
_atom_site_label
_atom_site_type_symbol
_atom_site_fract_x
_atom_site_fract_y
_atom_site_fract_z
_atom_site_U_iso_or_equiv
_atom_site_adp_type
_atom_site_occupancy
_atom_site_symmetry_multiplicity
_atom_site_calc_flag
_atom_site_refinement_flags
_atom_site_disorder_assembly
_atom_site_disorder_group
O1 O 0.1794(7) 0.3350(4) 0.03985(15) 0.0243(11) Uani 1 1 d . . .
O2 O 0.4765(7) 0.4188(4) 0.05299(15) 0.0240(11) Uani 1 1 d . . .
O3 O 0.3336(8) 0.3908(4) 0.15551(18) 0.0360(14) Uani 1 1 d . . .
O4 O 0.431(3) 0.7289(16) 0.2560(5) 0.246(13) Uani 1 1 d . . .
O5 O 0.1288(11) 0.6879(13) 0.2148(2) 0.122(5) Uani 1 1 d D . .
N1 N 0.3050(9) 0.5439(4) 0.11722(18) 0.0219(13) Uani 1 1 d . . .
N2 N 0.4917(9) 0.5096(5) 0.22563(19) 0.0294(15) Uani 1 1 d . . .
H3 H 0.5593 0.4541 0.2366 0.035 Uiso 1 1 calc R . .
C1 C 0.3101(12) 0.6645(6) 0.1093(2) 0.0289(17) Uani 1 1 d . . .
H1 H 0.3119 0.7046 0.1371 0.035 Uiso 1 1 calc R . .
C2 C 0.4918(12) 0.6991(6) 0.0823(3) 0.0346(19) Uani 1 1 d . . .
H2A H 0.6174 0.6946 0.0997 0.041 Uiso 1 1 calc R . .
H2B H 0.5065 0.6485 0.0578 0.041 Uiso 1 1 calc R . .
C3 C 0.4646(13) 0.8146(7) 0.0662(3) 0.046(2) Uani 1 1 d . . .
H3A H 0.4572 0.8654 0.0907 0.055 Uiso 1 1 calc R . .
H3B H 0.5841 0.8353 0.0487 0.055 Uiso 1 1 calc R . .
C4 C 0.2752(14) 0.8259(6) 0.0397(3) 0.044(2) Uani 1 1 d . . .
H4A H 0.2864 0.7788 0.0141 0.053 Uiso 1 1 calc R . .
H4B H 0.2616 0.9027 0.0300 0.053 Uiso 1 1 calc R . .
C5 C 0.0875(13) 0.7938(6) 0.0649(3) 0.036(2) Uani 1 1 d . . .
H5A H -0.0309 0.7928 0.0454 0.044 Uiso 1 1 calc R . .
H5B H 0.0615 0.8504 0.0869 0.044 Uiso 1 1 calc R . .
C6 C 0.1038(11) 0.6820(6) 0.0869(3) 0.0283(17) Uani 1 1 d . . .
H6 H -0.0058 0.6772 0.1090 0.034 Uiso 1 1 calc R . .
C7 C 0.0852(13) 0.5824(6) 0.0575(3) 0.0332(18) Uani 1 1 d . . .
H7A H 0.1665 0.5921 0.0312 0.040 Uiso 1 1 calc R . .
H7B H -0.0583 0.5683 0.0497 0.040 Uiso 1 1 calc R . .
C8 C 0.1722(9) 0.4889(5) 0.0858(2) 0.0187(15) Uani 1 1 d . . .
H8 H 0.0587 0.4504 0.1009 0.022 Uiso 1 1 calc R . .
C9 C 0.2903(11) 0.4073(5) 0.0580(2) 0.0240(15) Uani 1 1 d . . .
C10 C 0.3749(11) 0.4873(6) 0.1501(2) 0.0260(16) Uani 1 1 d . . .
C11 C 0.5277(11) 0.5441(6) 0.1807(2) 0.0256(16) Uani 1 1 d . . .
H11 H 0.5148 0.6254 0.1782 0.031 Uiso 1 1 calc R . .
C12 C 0.7373(12) 0.5086(7) 0.1670(2) 0.0346(18) Uani 1 1 d . . .
H12A H 0.8392 0.5443 0.1851 0.052 Uiso 1 1 calc R . .
H12B H 0.7597 0.5295 0.1372 0.052 Uiso 1 1 calc R . .
H12C H 0.7494 0.4290 0.1699 0.052 Uiso 1 1 calc R . .
C13 C 0.351(3) 0.5659(11) 0.2500(7) 0.172(13) Uani 1 1 d D . .
H13 H 0.4586 0.5926 0.2699 0.207 Uiso 1 1 calc R . .
C14 C 0.234(3) 0.5194(11) 0.2851(5) 0.218(18) Uani 1 1 d D . .
H14A H 0.3145 0.5141 0.3118 0.262 Uiso 1 1 calc R . .
H14B H 0.1750 0.4472 0.2780 0.262 Uiso 1 1 calc R . .
C15 C 0.0745(13) 0.6101(9) 0.2868(3) 0.050(2) Uani 1 1 d D . .
H15A H 0.1294 0.6576 0.2639 0.060 Uiso 1 1 calc R . .
H15B H 0.1197 0.6464 0.3135 0.060 Uiso 1 1 calc R . .
C16 C -0.153(3) 0.6519(12) 0.2863(4) 0.150(11) Uani 1 1 d D . .
H16A H -0.1556 0.7313 0.2909 0.225 Uiso 1 1 calc R . .
H16B H -0.2298 0.6155 0.3090 0.225 Uiso 1 1 calc R . .
H16C H -0.2149 0.6349 0.2586 0.225 Uiso 1 1 calc R . .
C17 C 0.317(3) 0.6823(12) 0.2317(4) 0.51(5) Uani 1 1 d D . .
C18 C 0.076(11) 0.766(6) 0.1835(19) 0.66(6) Uani 1 1 d DU . .
H18A H 0.0603 0.7238 0.1566 0.790 Uiso 1 1 calc R . .
H18B H 0.1983 0.8119 0.1797 0.790 Uiso 1 1 calc R . .
C19 C -0.101(7) 0.8451(10) 0.1841(10) 0.40(3) Uani 1 1 d DU . .
H19A H -0.0819 0.9008 0.1620 0.597 Uiso 1 1 calc R . .
H19B H -0.1090 0.8806 0.2121 0.597 Uiso 1 1 calc R . .
H19C H -0.2282 0.8052 0.1786 0.597 Uiso 1 1 calc R . .
N3 N 0.7749(8) 0.2628(4) 0.03739(18) 0.0208(12) Uani 1 1 d . . .
H3D H 0.6757 0.3140 0.0409 0.031 Uiso 1 1 calc R . .
H3E H 0.7648 0.2328 0.0109 0.031 Uiso 1 1 calc R . .
H3C H 0.8990 0.2949 0.0404 0.031 Uiso 1 1 calc R . .
C20 C 0.7508(12) 0.1757(5) 0.0701(2) 0.0283(17) Uani 1 1 d . . .
C21 C 0.9163(12) 0.0921(7) 0.0639(3) 0.0344(19) Uani 1 1 d . . .
H21A H 1.0491 0.1264 0.0688 0.052 Uiso 1 1 calc R . .
H21B H 0.9104 0.0633 0.0347 0.052 Uiso 1 1 calc R . .
H21C H 0.8974 0.0319 0.0843 0.052 Uiso 1 1 calc R . .
C22 C 0.7674(12) 0.2286(6) 0.1147(2) 0.0289(16) Uani 1 1 d . . .
H22A H 0.6572 0.2817 0.1184 0.043 Uiso 1 1 calc R . .
H22B H 0.8988 0.2660 0.1173 0.043 Uiso 1 1 calc R . .
H22C H 0.7569 0.1717 0.1366 0.043 Uiso 1 1 calc R . .
C23 C 0.5407(12) 0.1234(6) 0.0632(3) 0.0357(19) Uani 1 1 d . . .
H23A H 0.4346 0.1784 0.0680 0.053 Uiso 1 1 calc R . .
H23B H 0.5226 0.0627 0.0832 0.053 Uiso 1 1 calc R . .
H23C H 0.5309 0.0959 0.0339 0.053 Uiso 1 1 calc R . .

loop_
_atom_site_aniso_label
_atom_site_aniso_U_11
_atom_site_aniso_U_22
_atom_site_aniso_U_33
_atom_site_aniso_U_23
_atom_site_aniso_U_13
_atom_site_aniso_U_12
O1 0.019(2) 0.031(3) 0.023(2) -0.012(2) -0.0001(19) -0.006(2)
O2 0.022(3) 0.024(2) 0.026(3) -0.004(2) 0.002(2) 0.002(2)
O3 0.048(3) 0.021(3) 0.039(3) 0.002(2) -0.022(3) -0.001(2)
O4 0.32(2) 0.26(2) 0.165(13) -0.143(14) 0.104(15) -0.238(19)
O5 0.032(4) 0.298(15) 0.035(4) -0.027(7) -0.003(3) -0.011(6)
N1 0.024(3) 0.016(3) 0.025(3) -0.004(2) -0.003(3) 0.000(2)
N2 0.029(3) 0.034(3) 0.025(3) -0.003(3) 0.000(3) 0.006(3)
C1 0.035(4) 0.019(3) 0.033(4) -0.004(3) 0.000(3) 0.009(3)
C2 0.028(4) 0.030(4) 0.045(5) 0.002(4) 0.001(4) -0.001(3)
C3 0.034(4) 0.033(4) 0.071(6) 0.011(4) 0.016(4) -0.009(4)
C4 0.059(5) 0.022(4) 0.050(5) 0.008(4) 0.005(5) 0.011(4)
C5 0.042(5) 0.019(4) 0.049(5) 0.003(3) -0.001(4) 0.010(3)
C6 0.025(4) 0.021(4) 0.040(4) 0.001(3) 0.004(3) 0.007(3)
C7 0.035(4) 0.031(4) 0.034(4) -0.012(3) -0.018(3) 0.014(3)
C8 0.009(3) 0.019(3) 0.028(4) -0.005(3) 0.001(3) -0.001(3)
C9 0.025(4) 0.020(3) 0.026(3) -0.004(3) -0.001(3) -0.001(3)
C10 0.026(4) 0.027(4) 0.024(4) 0.000(3) 0.000(3) -0.001(3)
C11 0.032(4) 0.023(4) 0.021(3) -0.002(3) 0.002(3) -0.002(3)
C12 0.034(4) 0.043(5) 0.027(4) -0.011(3) -0.013(3) -0.003(4)
C13 0.24(2) 0.058(8) 0.22(2) 0.083(11) 0.21(2) 0.075(11)
C14 0.54(6) 0.051(8) 0.065(9) 0.000(7) -0.05(2) 0.03(2)
C15 0.042(5) 0.066(7) 0.042(5) -0.002(5) 0.005(4) 0.003(5)
C16 0.32(3) 0.083(10) 0.043(7) -0.010(7) -0.045(12) 0.091(15)
C17 0.65(6) 0.54(5) 0.34(4) -0.41(4) -0.46(5) 0.58(6)
C18 0.74(10) 0.53(7) 0.70(10) 0.37(7) -0.14(7) 0.34(7)
C19 0.83(8) 0.018(7) 0.35(3) -0.069(12) 0.50(5) -0.086(17)
N3 0.014(3) 0.026(3) 0.022(3) -0.003(2) -0.001(2) 0.003(2)
C20 0.037(4) 0.014(3) 0.033(4) 0.001(3) 0.001(3) -0.004(3)
C21 0.036(4) 0.032(4) 0.035(4) 0.003(3) 0.005(3) 0.019(4)
C22 0.040(4) 0.027(4) 0.019(3) 0.000(3) 0.003(3) 0.002(3)
C23 0.033(4) 0.024(4) 0.050(5) 0.005(4) 0.008(4) -0.002(3)

_geom_special_details            
; 
 All esds (except the esd in the dihedral angle between two l.s. planes) 
 are estimated using the full covariance matrix.  The cell esds are taken 
 into account individually in the estimation of esds in distances, angles 
 and torsion angles; correlations between esds in cell parameters are only 
 used when they are defined by crystal symmetry.  An approximate (isotropic) 
 treatment of cell esds is used for estimating esds involving l.s. planes. 
;

loop_
_geom_bond_atom_site_label_1
_geom_bond_atom_site_label_2
_geom_bond_distance
_geom_bond_site_symmetry_2
_geom_bond_publ_flag
O1 C9 1.278(8) . ?
O2 C9 1.242(8) . ?
O3 C10 1.222(9) . ?
O4 C17 1.21(2) . ?
O5 C17 1.351(16) . ?
O5 C18 1.412(19) . ?
N1 C10 1.324(9) . ?
N1 C8 1.478(9) . ?
N1 C1 1.493(9) . ?
N2 C13 1.384(13) . ?
N2 C11 1.488(9) . ?
C1 C2 1.523(11) . ?
C1 C6 1.542(11) . ?
C2 C3 1.510(12) . ?
C3 C4 1.502(13) . ?
C4 C5 1.517(12) . ?
C5 C6 1.534(10) . ?
C6 C7 1.530(11) . ?
C7 C8 1.555(10) . ?
C8 C9 1.535(9) . ?
C10 C11 1.551(10) . ?
C11 C12 1.507(11) . ?
C13 C14 1.455(16) . ?
C13 C17 1.549(15) . ?
C14 C15 1.528(16) . ?
C15 C16 1.581(16) . ?
C18 C19 1.51(2) . ?
N3 C20 1.485(9) . ?
C20 C21 1.505(10) . ?
C20 C23 1.537(11) . ?
C20 C22 1.544(10) . ?

loop_
_geom_angle_atom_site_label_1
_geom_angle_atom_site_label_2
_geom_angle_atom_site_label_3
_geom_angle
_geom_angle_site_symmetry_1
_geom_angle_site_symmetry_3
_geom_angle_publ_flag
C17 O5 C18 122(4) . . ?
C10 N1 C8 119.1(6) . . ?
C10 N1 C1 129.5(6) . . ?
C8 N1 C1 110.6(5) . . ?
C13 N2 C11 119.2(9) . . ?
N1 C1 C2 112.6(6) . . ?
N1 C1 C6 101.1(6) . . ?
C2 C1 C6 113.5(6) . . ?
C3 C2 C1 110.7(7) . . ?
C4 C3 C2 111.7(7) . . ?
C3 C4 C5 111.3(7) . . ?
C4 C5 C6 114.0(6) . . ?
C7 C6 C5 115.6(7) . . ?
C7 C6 C1 103.5(6) . . ?
C5 C6 C1 112.9(6) . . ?
C6 C7 C8 102.2(6) . . ?
N1 C8 C9 112.0(5) . . ?
N1 C8 C7 105.2(5) . . ?
C9 C8 C7 109.9(6) . . ?
O2 C9 O1 125.8(6) . . ?
O2 C9 C8 119.8(6) . . ?
O1 C9 C8 114.3(6) . . ?
O3 C10 N1 122.3(7) . . ?
O3 C10 C11 119.4(6) . . ?
N1 C10 C11 118.2(6) . . ?
N2 C11 C12 109.4(6) . . ?
N2 C11 C10 110.8(6) . . ?
C12 C11 C10 106.8(5) . . ?
N2 C13 C14 125.1(10) . . ?
N2 C13 C17 110.3(10) . . ?
C14 C13 C17 124.3(12) . . ?
C13 C14 C15 96.0(10) . . ?
C14 C15 C16 152.2(13) . . ?
O4 C17 O5 142.2(17) . . ?
O4 C17 C13 96.5(18) . . ?
O5 C17 C13 108.7(18) . . ?
O5 C18 C19 128(4) . . ?
N3 C20 C21 108.7(6) . . ?
N3 C20 C23 107.2(6) . . ?
C21 C20 C23 110.5(6) . . ?
N3 C20 C22 108.5(5) . . ?
C21 C20 C22 110.4(6) . . ?
C23 C20 C22 111.4(7) . . ?

_diffrn_measured_fraction_theta_max 0.989
_diffrn_reflns_theta_full        25.70
_diffrn_measured_fraction_theta_full 0.989
_refine_diff_density_max         2.307
_refine_diff_density_min         -0.745
_refine_diff_density_rms         0.173
